# Supplementary material for: Bioinformatics analysis identifies several intrinsically disordered human E3 ubiquitin-protein ligases
Source: PeerJ. 2016 Feb 25;4:e1725. doi: 10.7717/peerj.1725 (PMC4782732; doi:10.7717/peerj.1725)
Supplement: Table S1 — A dynamic table of the entire E3 set discussed in this manuscript. Each protein is annotated with position specific disorder and ANCHOR score predictions, in addition to the three sliding window scores and the final San1 similarity score. The table can readily be sorted by each of these columns. This spreadsheet is extracted from a more elaborate Excel sheet, which for space concerns has been uploaded to an external repository ( http://github.com/e3-disorder/e3_table/). The complete version contains a parameter sheet where individual parameters (such as the size of the sliding window and the length of the ANCHOR stretch) can be modified, thus providing the possibility of recalculating all sliding window scores for different choices of the parameter values. [file peerj-04-1725-s003.xlsx]

## Sheet: Sheet1
ID	HMMSEARCH E-VAL	mobidb_consensus (% > 0.5)	anchor (% > 0.5)	%LYS	%LYS in (consensus>0.5)	ANCHOR stretches	Disorder x Anchor	Sliding window score
sp|O95071|UBR5_HUMAN		0.337263	0.257592	0.0421579	0.0370763	0.189711	6.39824	0.753333
sp|Q9Y252|RNF6_HUMAN	9.8e-15	0.654015	0.439416	0.00583942	0.00223214	0.322628	21.1003	0.642133
sp|P22470|SAN1_YEAST	1.1e-257	0.780328	0.532787	0.0229508	0.0189076	0.362295	28.2709	0.622489
sp|Q9NTX7|RN146_HUMAN	0.00023	0.523677	0.37883	0.0362117	0	0.259053	13.566	0.62
sp|P53924|DMA2_YEAST	3.1	0.408046	0.296935	0.0363985	0.00938967	0.222222	9.06769	0.613511
sp|Q9NVW2|RNF12_HUMAN	1.9e-20	0.772436	0.429487	0.00961538	0.00414938	0.370192	28.595	0.613333
sp|Q86TM6|SYVN1_HUMAN	5e-17	0.36953	0.351702	0.0210697	0.00438596	0.320908	11.8585	0.603022
sp|Q6ZNA4|RN111_HUMAN	1.1e-15	0.752515	0.556338	0.0321932	0.026738	0.361167	27.1784	0.580267
sp|Q9NWF9|RN216_HUMAN		0.371824	0.258661	0.0554273	0.0341615	0.167436	6.2257	0.569664
sp|Q969H0|FBXW7_HUMAN		0.281471	0.18529	0.0523338	0.0301508	0.138614	3.90158	0.545956
sp|Q76N89|HECW1_HUMAN		0.40411	0.249689	0.0336239	0.0154083	0.1401	5.66156	0.524933
sp|Q7Z6Z7|HUWE1_HUMAN		0.353224	0.290352	0.0436671	0.0485437	0.130773	4.6192	0.498222
sp|Q75N03|HAKAI_HUMAN		0.739308	0.454175	0.0366599	0.0220386	0.256619	18.972	0.486667
sp|P46934|NEDD4_HUMAN		0.275208	0.226687	0.0507961	0.0247934	0.0962851	2.64985	0.465906
sp|Q6PCD5|RFWD3_HUMAN	1.2e-09	0.317829	0.25323	0.0335917	0.0121951	0.142119	4.51696	0.463733
sp|Q9H992|MARH7_HUMAN		0.735795	0.447443	0.0213068	0.0135135	0.286932	21.1123	0.45891
sp|O94972|TRI37_HUMAN		0.394191	0.306017	0.0497925	0.0421053	0.205394	8.09645	0.441767
sp|Q9ULT8|HECD1_HUMAN		0.286973	0.178544	0.0490421	0.0574099	0.08659	2.4849	0.440889
sp|Q96RE7|NACC1_HUMAN		0.42315	0.28463	0.0398482	0.0269058	0.172676	7.30676	0.392581
sp|P40318|DOA10_YEAST		0.15997	0.0978014	0.0485216	0.00947867	0.0515542	0.824711	0.386844
sp|O15209|ZBT22_HUMAN		0.616719	0.433754	0.0299685	0.00767263	0.230284	14.2021	0.378676
sp|Q9P2P5|HECW2_HUMAN		0.424936	0.36514	0.0311705	0.00748503	0.0966921	4.1088	0.373333
sp|O94819|KBTBB_HUMAN		0.306581	0.229535	0.00802568	0.0052356	0.123596	3.7892	0.366489
sp|Q9H5J0|ZBTB3_HUMAN		0.520906	0.393728	0.0348432	0.0334448	0.19338	10.0733	0.359217
sp|Q9P1Z0|ZBTB4_HUMAN		0.688055	0.476802	0.035538	0.0301291	0.331688	22.822	0.357822
sp|Q8NG27|PJA1_HUMAN	2.2e-18	0.780715	0.485226	0.0435459	0.0458167	0.290824	22.7051	0.353333
sp|Q96JK2|DCAF5_HUMAN		0.532909	0.304671	0.037155	0.0378486	0.240977	12.8419	0.34452
sp|O15016|TRI66_HUMAN		0.483553	0.310033	0.0485197	0.0408163	0.125	6.04441	0.34006
sp|Q8IY92|SLX4_HUMAN		0.736641	0.585605	0.0490731	0.0555144	0.258997	19.0788	0.337933
sp|O14512|SOCS7_HUMAN		0.538726	0.444062	0.0378657	0.0255591	0.196213	10.5705	0.33733
sp|P33202|UFD4_YEAST		0.145651	0.0903574	0.0532704	0.00462963	0.0364127	0.530353	0.3336
sp|P38398|BRCA1_HUMAN		0.810521	0.388621	0.0735373	0.0754967	0.236715	19.1862	0.332889
sp|Q9P2G1|AKIB1_HUMAN	0.00022	0.304867	0.28742	0.0505051	0.0150602	0.188246	5.739	0.331467
sp|O15156|ZBT7B_HUMAN		0.556586	0.415584	0.0333952	0.0233333	0.237477	13.2176	0.331298
sp|Q58WW2|DCAF6_HUMAN		0.477907	0.336047	0.0348837	0.0316302	0.0755814	3.61209	0.331111
sp|Q6ZN04|MEX3B_HUMAN		0.578207	0.377856	0.026362	0.0182371	0.177504	10.2634	0.330489
sp|Q8TF61|FBX41_HUMAN		0.378286	0.234286	0.0331429	0.021148	0.124571	4.71236	0.328889
sp|Q8NCP5|ZBT44_HUMAN		0.463158	0.192982	0.0473684	0.0340909	0.140351	6.50046	0.3224
sp|Q8NF64|ZMIZ2_HUMAN		0.602174	0.45	0.026087	0.0180505	0.129348	7.78899	0.319349
sp|Q9NS56|TOPRS_HUMAN	1.4e-08	0.636364	0.401914	0.0641148	0.0781955	0.288995	18.3906	0.31489
sp|Q68DV7|RNF43_HUMAN	3.7e-14	0.494253	0.303959	0.0217114	0.0155039	0.159642	7.89037	0.308622
sp|P40072|SLX8_YEAST	0.00034	0.675182	0.434307	0.0510949	0.0486486	0.240876	16.2635	0.307413
sp|Q8WWI1|LMO7_HUMAN		0.507427	0.226381	0.0713012	0.0737705	0.137255	6.96469	0.303033
sp|Q86Y01|DTX1_HUMAN	0.0065	0.36129	0.225806	0.0467742	0.0758929	0.154839	5.59417	0.293191
sp|O00308|WWP2_HUMAN		0.314943	0.25977	0.0482759	0.0255474	0.0988506	3.11322	0.292415
sp|O15062|ZBTB5_HUMAN		0.553914	0.420975	0.0398818	0.0266667	0.308715	17.1002	0.291822
sp|Q6P3S6|FBX42_HUMAN		0.449093	0.375174	0.0404463	0.0124224	0.142259	6.38878	0.289948
sp|P22681|CBL_HUMAN		0.492274	0.345475	0.0518764	0.0336323	0.211921	10.4323	0.288567
sp|Q9HC78|ZBT20_HUMAN		0.4278	0.303644	0.0404858	0.0347003	0.195682	8.37126	0.280914
sp|Q13233|M3K1_HUMAN		0.437831	0.332672	0.0449735	0.0453172	0.190476	8.33963	0.2736
sp|O95625|ZBT11_HUMAN		0.346629	0.209877	0.0892688	0.0958904	0.127255	4.41104	0.272965
sp|P39940|RSP5_YEAST		0.28801	0.194067	0.0482077	0.0171674	0.0704574	2.02924	0.271573
sp|Q6PIJ6|FBX38_HUMAN		0.347643	0.184343	0.0505051	0.0508475	0.0496633	1.72651	0.270667
sp|Q92794|KAT6A_HUMAN		0.5998	0.369261	0.0698603	0.0665557	0.16018	9.60758	0.264576
sp|P32828|SLX5_YEAST		0.366721	0.240711	0.0403877	0.0352423	0.105008	3.85086	0.26
sp|Q03280|TOM1_YEAST		0.130661	0.0832313	0.0651775	0.0515222	0.0309058	0.403818	0.259556
sp|Q8ND25|ZNRF1_HUMAN	2.2e-10	0.524229	0.295154	0.0264317	0.00840336	0.242291	12.7016	0.253701
sp|Q5TC82|RC3H1_HUMAN		0.465137	0.400706	0.043248	0.0398482	0.305384	14.2045	0.249426
sp|Q96PX1|RN157_HUMAN		0.487482	0.354934	0.0353461	0.0181269	0.0824742	4.02047	0.24937
sp|Q5QP82|DCA10_HUMAN		0.32737	0.241503	0.0322004	0.0163934	0.119857	3.92376	0.247751
sp|P38352|SAF1_YEAST		0.232339	0.172684	0.0486656	0.027027	0.10675	2.48023	0.245888
sp|Q13191|CBLB_HUMAN		0.476578	0.356415	0.0560081	0.042735	0.199593	9.51216	0.244631
sp|Q5T4S7|UBR4_HUMAN		0.157438	0.0949257	0.0555663	0.067402	0.0293266	0.461712	0.24255
sp|Q63HN8|RN213_HUMAN		0.111581	0.0558863	0.0591511	0.070568	0.015556	0.173575	0.238444
sp|P19812|UBR1_YEAST		0.0876923	0.0723077	0.0630769	0.0350877	0.0379487	0.332781	0.237111
sp|O95365|ZBT7A_HUMAN		0.422945	0.35274	0.0445205	0.0202429	0.143836	6.08346	0.236023
sp|P30260|CDC27_HUMAN		0.276699	0.177184	0.0716019	0.0745614	0.114078	3.15652	0.233343
sp|Q8WWQ0|PHIP_HUMAN		0.358594	0.229544	0.0746842	0.111792	0.128501	4.60796	0.23031
tr|Q4ZH49|Q4ZH49_HUMAN		0.327974	0.236334	0.0369775	0.0490196	0.149518	4.9038	0.226004
sp|Q96CT2|KLH29_HUMAN		0.237714	0.203429	0.0354286	0.0144231	0.161143	3.8306	0.223333
sp|Q96J02|ITCH_HUMAN		0.259136	0.178295	0.0520487	0.042735	0.0908084	2.35317	0.222341
sp|Q9H1B7|I2BPL_HUMAN		0.624372	0.46608	0.0389447	0.0261569	0.0979899	6.11822	0.221867
sp|Q7Z6J0|SH3R1_HUMAN	0.0001	0.449324	0.310811	0.0518018	0.047619	0.143018	6.42615	0.22176
sp|Q12986|NFX1_HUMAN		0.384821	0.236607	0.075	0.0858469	0.2125	8.17746	0.219556
sp|P29590|PML_HUMAN		0.269841	0.141723	0.0340136	0.0420168	0.0975057	2.63111	0.218997
sp|Q14669|TRIPC_HUMAN		0.364458	0.238454	0.061747	0.0853994	0.112952	4.11662	0.218156
sp|Q13064|MKRN3_HUMAN	0.00097	0.284024	0.213018	0.0335306	0.00694444	0.185404	5.26592	0.215467
sp|Q9BYV6|TRI55_HUMAN		0.452555	0.337591	0.0583942	0.0403226	0.184307	8.34088	0.211422
sp|Q96A61|TRI52_HUMAN		0.316498	0.343434	0.030303	0.0319149	0.299663	9.48429	0.210391
sp|Q00987|MDM2_HUMAN		0.490835	0.232179	0.0631365	0.0539419	0.095723	4.69842	0.210337
sp|Q9BV68|RN126_HUMAN	3e-27	0.506135	0.294479	0.0122699	0.0181818	0.165644	8.38383	0.2064
sp|Q12161|PSH1_YEAST	1.3e-09	0.605911	0.32266	0.046798	0.0325203	0.142857	8.65588	0.206222
sp|Q96DX7|TRI44_HUMAN		0.549419	0.531977	0.0494186	0.037037	0.188953	10.3815	0.205053
sp|O43164|PJA2_HUMAN	9.1e-20	0.634181	0.474576	0.029661	0.0356347	0.248588	15.7649	0.203869
sp|P24814|GRR1_YEAST		0.147698	0.114683	0.0451781	0	0.0947003	1.3987	0.201387
sp|Q9Y2K7|KDM2A_HUMAN		0.291738	0.122203	0.0611015	0.0471976	0.0817556	2.38512	0.19856
sp|O60291|MGRN1_HUMAN		0.355072	0.259058	0.048913	0.0612245	0.152174	5.40328	0.198536
sp|Q9UFB7|ZBT47_HUMAN		0.445783	0.317269	0.0589023	0.033033	0.188755	8.41438	0.192267
sp|O15164|TIF1A_HUMAN	0.0092	0.453333	0.306667	0.0628571	0.0441176	0.0857143	3.88571	0.192
sp|Q15751|HERC1_HUMAN		0.170747	0.109031	0.043201	0.0493976	0.0438181	0.748181	0.188693
sp|Q04511|UFO1_YEAST		0.258982	0.140719	0.0553892	0.0289017	0.0479042	1.24063	0.186311
sp|Q9Y2Y4|ZBT32_HUMAN		0.494867	0.336756	0.036961	0.0580913	0.238193	11.7874	0.181547
sp|Q5TC79|ZBT37_HUMAN		0.477137	0.272366	0.0377734	0.0208333	0.135189	6.45036	0.178916
sp|Q6PJ61|FBX46_HUMAN		0.558872	0.41791	0.0414594	0.0326409	0.290216	16.2193	0.176176
sp|Q9NSI6|BRWD1_HUMAN		0.443966	0.253448	0.0719828	0.0873786	0.122414	5.43475	0.175093
sp|Q96C00|ZBTB9_HUMAN		0.526427	0.346723	0.0443975	0.0321285	0.131078	6.90031	0.174396
sp|Q9H2P0|ADNP_HUMAN		0.452813	0.239564	0.0898367	0.0921844	0.126134	5.71153	0.174297
sp|Q9NR64|KLHL1_HUMAN		0.240642	0.121658	0.0454545	0.0444444	0.0895722	2.15548	0.173962
sp|Q9ULT6|ZNRF3_HUMAN	1.7e-19	0.456197	0.246795	0.0267094	0.00936768	0.0886752	4.04533	0.173778
sp|Q6ZMZ0|RN19B_HUMAN		0.400273	0.285519	0.0409836	0.0307167	0.13388	5.35885	0.1728
sp|Q6PCT2|FXL19_HUMAN		0.489914	0.21902	0.0461095	0.0558824	0.0778098	3.81201	0.16992
sp|Q8N5U6|RNF10_HUMAN	0.00017	0.451295	0.325524	0.0739827	0.0956284	0.145499	6.56631	0.169867
sp|Q9BSF8|BTBDA_HUMAN		0.4	0.292632	0.0547368	0.0526316	0.227368	9.09474	0.168
sp|Q96DT7|ZBT10_HUMAN		0.487945	0.359357	0.0528129	0.0188235	0.119403	5.82621	0.167834
sp|Q6RI45|BRWD3_HUMAN		0.346282	0.198668	0.0554939	0.0721154	0.0882353	3.05543	0.16594
sp|P41002|CCNF_HUMAN		0.24173	0.173028	0.043257	0.0368421	0.119593	2.89092	0.165134
sp|Q9P203|BTBD7_HUMAN		0.388693	0.268551	0.045053	0.0522727	0.0954064	3.70837	0.164814
sp|Q8IYW5|RN168_HUMAN		0.704028	0.425569	0.089317	0.0995025	0.243433	17.1383	0.164058
sp|Q9H0M0|WWP1_HUMAN		0.334056	0.224512	0.0488069	0.0292208	0.0639913	2.13767	0.163271
sp|Q9Y3I1|FBX7_HUMAN		0.298851	0.264368	0.0344828	0	0.153257	4.58009	0.161156
sp|Q8NHG8|ZNRF2_HUMAN	9.5e-10	0.619835	0.400826	0.0247934	0.00666667	0.103306	6.40325	0.154652
sp|O43918|AIRE_HUMAN		0.502752	0.304587	0.0440367	0.0583942	0.188991	9.50156	0.153674
sp|O95155|UBE4B_HUMAN		0.270353	0.168971	0.047619	0.0198864	0.0368664	0.996694	0.152
sp|Q9HCE7|SMUF1_HUMAN		0.150594	0.141347	0.0501982	0.00877193	0.0620872	0.934999	0.148311
sp|Q8N680|ZBTB2_HUMAN		0.367704	0.241245	0.0505837	0.026455	0.142023	5.22226	0.148089
sp|Q86T24|KAISO_HUMAN		0.342262	0.30506	0.0580357	0.0565217	0.16369	5.6025	0.148016
sp|Q9Y4B6|VPRBP_HUMAN		0.231586	0.17651	0.0451228	0.0601719	0.0630392	1.4599	0.143757
sp|Q8WV44|TRI41_HUMAN		0.342857	0.312698	0.0333333	0.0138889	0.0825397	2.82993	0.142222
sp|O43567|RNF13_HUMAN	3.3e-31	0.272966	0.139108	0.0603675	0.00961538	0.131234	3.58223	0.14083
sp|Q2Q1W2|LIN41_HUMAN	0.0081	0.16129	0.0875576	0.0403226	0.00714286	0.0552995	0.891928	0.1408
sp|Q8NA82|MARHA_HUMAN		0.675743	0.407178	0.0544554	0.0604396	0.193069	13.0465	0.139314
sp|Q8N531|FBXL6_HUMAN		0.191095	0.128015	0.0315399	0.0291262	0.116883	2.23357	0.138619
sp|Q86UK7|ZN598_HUMAN		0.589602	0.317478	0.0486726	0.054409	0.123894	7.3048	0.135556
sp|Q8NHM5|KDM2B_HUMAN		0.408683	0.210329	0.0808383	0.106227	0.13024	5.32266	0.135111
sp|Q8NCN2|ZBT34_HUMAN		0.428	0.202	0.044	0.0233645	0.102	4.3656	0.133824
sp|Q8TC41|RN217_HUMAN		0.381919	0.271218	0.0571956	0.0193237	0.118081	4.50974	0.132954
sp|Q96AX9|MIB2_HUMAN		0.171767	0.138203	0.0335637	0.0287356	0.071076	1.22085	0.131413
sp|O95628|CNOT4_HUMAN		0.509565	0.382609	0.0573913	0.0648464	0.137391	7.00098	0.131413
sp|Q9UJT9|FBXL7_HUMAN		0.234216	0.136456	0.0427699	0.0434783	0.112016	2.6236	0.131413
sp|Q05516|ZBT16_HUMAN		0.280832	0.268945	0.0549777	0.037037	0.117385	3.29654	0.129653
sp|Q9UH90|FBX40_HUMAN		0.197461	0.150917	0.0662906	0.0642857	0.124118	2.45086	0.128299
sp|Q8WZ73|RFFL_HUMAN		0.396694	0.14876	0.0440771	0	0.0881543	3.49703	0.127659
sp|Q12873|CHD3_HUMAN		0.3725	0.2285	0.085	0.112752	0.092	3.427	0.125954
sp|Q13620|CUL4B_HUMAN		0.164294	0.100767	0.0920044	0.06	0.0657174	1.07969	0.124764
sp|Q9UF56|FXL17_HUMAN		0.328103	0.0898716	0.0485021	0.0173913	0.0513552	1.68498	0.123125
sp|Q6P050|FXL22_HUMAN		0.518219	0.307692	0.0283401	0.0234375	0.214575	11.1197	0.122677
sp|Q8NFZ0|FBX18_HUMAN		0.15628	0.093001	0.063279	0.0490798	0.0795781	1.24365	0.12192
sp|Q08281|RTC1_YEAST		0.41909	0.232662	0.0820283	0.0765125	0.143922	6.03165	0.117216
sp|Q86UZ6|ZBT46_HUMAN		0.521222	0.288625	0.0543294	0.0358306	0.0967742	5.04409	0.114441
sp|Q86XK2|FBX11_HUMAN		0.179072	0.101402	0.038835	0.0301205	0.0269687	0.482935	0.112156
sp|Q9UPN9|TRI33_HUMAN		0.459627	0.327418	0.0567879	0.030888	0.0559006	2.56935	0.11202
sp|Q06479|YL352_YEAST		0.164808	0.0384139	0.0594796	0.0300752	0.0297398	0.490135	0.111218
sp|O14544|SOCS6_HUMAN		0.375701	0.254206	0.0560748	0.0945274	0.143925	5.40728	0.110544
sp|P40337|VHL_HUMAN		0.29108	0.225352	0.0140845	0	0.197183	5.7396	0.110133
sp|Q8N3Y1|FBXW8_HUMAN		0.177258	0.0602007	0.0267559	0.0188679	0.0602007	1.0671	0.10944
sp|Q8IWT3|CUL9_HUMAN		0.174017	0.0993246	0.030592	0.0365297	0.0202622	0.352596	0.107893
sp|Q8TB52|FBX30_HUMAN		0.155705	0.116779	0.042953	0.0775862	0.0845638	1.3167	0.107651
sp|Q6TDP4|KLH17_HUMAN		0.147975	0.11838	0.0233645	0.0105263	0.107477	1.59039	0.105964
sp|Q5XUX0|FBX31_HUMAN		0.326531	0.187384	0.0296846	0.0113636	0.0742115	2.42323	0.102305
sp|A6NNE9|MARHB_HUMAN		0.497512	0.283582	0.0223881	0.005	0.0497512	2.47519	0.102222
sp|P38308|CS111_YEAST		0.406926	0.186147	0.0811688	0.0638298	0.0876623	3.56721	0.101617
sp|Q8TEC5|SH3R2_HUMAN	7e-09	0.437586	0.288066	0.0521262	0.0595611	0.138546	6.06257	0.0993813
sp|Q9HBD1|RC3H2_HUMAN		0.292191	0.235097	0.0486986	0.0431034	0.0839631	2.45333	0.0992
sp|O75150|BRE1B_HUMAN	0.0052	0.354645	0.265734	0.0769231	0.084507	0.0679321	2.40918	0.0982222
sp|Q9Y2E6|DTX4_HUMAN	0.00054	0.344103	0.289176	0.0581583	0.0938967	0.20517	7.05996	0.0958222
sp|Q9BX70|BTBD2_HUMAN		0.182857	0.118095	0.0342857	0	0.0704762	1.28871	0.094424
sp|O75592|MYCB2_HUMAN		0.198276	0.134267	0.0653017	0.117391	0.0446121	0.88455	0.0904593
sp|P35728|MPE1_YEAST		0.419501	0.333333	0.0793651	0.0756757	0.14966	6.27825	0.0896
sp|Q05580|YD266_YEAST		0.419405	0.217527	0.0938967	0.0970149	0.0782473	3.28173	0.0872296
sp|Q8NAP3|ZBT38_HUMAN		0.395816	0.212552	0.0736402	0.0739958	0.108787	4.30595	0.0872213
sp|Q9NVF7|FBX28_HUMAN		0.429348	0.296196	0.0597826	0.0632911	0.17663	7.58359	0.0855804
sp|Q96K62|ZBT45_HUMAN		0.569472	0.410959	0.0234834	0.0103093	0.0430528	2.45174	0.0848711
sp|P35227|PCGF2_HUMAN	4.8e-06	0.444767	0.311047	0.0639535	0.0457516	0.113372	5.04242	0.0845173
sp|Q9NUA8|ZBT40_HUMAN		0.214689	0.14205	0.0782889	0.105263	0.0581114	1.24759	0.0832296
sp|Q96BF6|NACC2_HUMAN		0.262351	0.243612	0.032368	0.0194805	0.127768	3.35201	0.0779422
sp|Q8TEB7|RN128_HUMAN	1.2e-19	0.242991	0.142523	0.0373832	0.0288462	0.067757	1.64643	0.0778833
sp|Q9UPQ7|PZRN3_HUMAN	1.1e-06	0.32833	0.298311	0.0581614	0.0485714	0.0806754	2.64882	0.0766969
sp|Q969K3|RNF34_HUMAN		0.27957	0.174731	0.0483871	0.0384615	0.0698925	1.95398	0.0766596
sp|Q9NS91|RAD18_HUMAN	0.00047	0.462626	0.284848	0.0969697	0.0960699	0.129293	5.98143	0.0765763
sp|Q96T51|RUFY1_HUMAN		0.257062	0.15678	0.079096	0.0549451	0.0762712	1.96064	0.0749467
sp|P10074|ZBT48_HUMAN		0.251453	0.0886628	0.0668605	0.0693642	0.059593	1.49849	0.0746382
sp|Q5SVQ8|ZBT41_HUMAN		0.251925	0.157316	0.10341	0.0786026	0.129813	3.27032	0.07392
sp|Q9Y4X5|ARI1_HUMAN		0.240575	0.184919	0.064632	0.0223881	0.032316	0.77744	0.073696
sp|Q9ULK6|RN150_HUMAN	3.1e-19	0.230594	0.130137	0.0479452	0.039604	0.086758	2.00058	0.0718791
sp|Q6ZSG1|RN165_HUMAN	5.3e-17	0.410405	0.33815	0.0260116	0.0422535	0.0462428	1.89782	0.0718222
sp|O96028|NSD2_HUMAN		0.337729	0.156044	0.0967033	0.123644	0.104762	3.53811	0.0711822
sp|Q13105|ZBT17_HUMAN		0.316314	0.22665	0.0709838	0.0787402	0.0410959	1.29992	0.0689333
sp|Q08562|ULS1_YEAST		0.221742	0.149475	0.0901791	0.086351	0.0741198	1.64355	0.0689173
sp|Q9BYE7|PCGF6_HUMAN	3.1e-09	0.445714	0.308571	0.0514286	0.0320513	0.0428571	1.9102	0.0688356
sp|O43290|SNUT1_HUMAN		0.60125	0.3125	0.095	0.0935551	0.08625	5.18578	0.0685707
sp|P10862|RAD18_YEAST	0.0011	0.439425	0.26078	0.0841889	0.0841121	0.147844	6.49663	0.0680284
sp|Q96BR9|ZBT8A_HUMAN		0.485261	0.142857	0.0725624	0.0747664	0.120181	5.83193	0.0676853
sp|P32917|STE5_YEAST		0.231189	0.175573	0.0545256	0.0188679	0.0272628	0.630285	0.0669778
sp|O60337|MARH6_HUMAN		0.127473	0.0373626	0.0252747	0.0172414	0.021978	0.280159	0.0666667
sp|Q96BD5|PF21A_HUMAN		0.448529	0.305882	0.0823529	0.0688525	0.185294	8.31099	0.0647111
sp|P38823|DMA1_YEAST		0.221154	0.185096	0.0504808	0.0108696	0.110577	2.44545	0.0621511
sp|Q15345|LRC41_HUMAN		0.259852	0.146552	0.0307882	0.0521327	0.0270936	0.704033	0.0619259
sp|Q99496|RING2_HUMAN	1.2e-14	0.342262	0.258929	0.0714286	0.0608696	0.157738	5.39877	0.0615585
sp|Q9H6Y7|RN167_HUMAN	3.8e-25	0.268571	0.122857	0.0285714	0.0212766	0.0914286	2.45551	0.0613831
sp|Q9NZJ0|DTL_HUMAN		0.446575	0.168493	0.0767123	0.0981595	0.0534247	2.38581	0.0606436
sp|A8MQ27|NEU1B_HUMAN	0.085	0.275676	0.133333	0.0198198	0.0196078	0.045045	1.24178	0.0586667
sp|Q5XPI4|RN123_HUMAN	0.0059	0.134703	0.0502283	0.0395738	0.0508475	0.0251142	0.338296	0.0586667
sp|Q8N448|LNX2_HUMAN	0.00018	0.227536	0.143478	0.0391304	0.0191083	0.104348	2.37429	0.0577828
sp|Q96BH1|RNF25_HUMAN	7.8e-06	0.610022	0.416122	0.0479303	0.0535714	0.0827887	5.05029	0.0570732
sp|Q13263|TIF1B_HUMAN	0.0018	0.42994	0.240719	0.0502994	0.0362117	0.0467066	2.0081	0.0558133
sp|Q15326|ZMY11_HUMAN		0.302326	0.127907	0.10299	0.10989	0.0930233	2.81233	0.055552
sp|Q9H1A4|APC1_HUMAN		0.111111	0.0396091	0.0406379	0.0416667	0.0144033	0.160037	0.0552865
sp|Q9UKV5|AMFR_HUMAN	3.3e-23	0.209953	0.11042	0.0202177	0	0.0279938	0.587739	0.0552
sp|Q9C0B0|UNK_HUMAN		0.303704	0.214815	0.0493827	0.0365854	0.0432099	1.3123	0.0550978
sp|O15060|ZBT39_HUMAN		0.31882	0.192416	0.0547753	0.0440529	0.0308989	0.985119	0.0536604
sp|Q5TAQ9|DCAF8_HUMAN		0.356784	0.19263	0.0502513	0.028169	0.0284757	1.01597	0.0536444
sp|O95361|TRI16_HUMAN		0.177305	0.108156	0.0673759	0.04	0.0868794	1.54042	0.0519327
sp|O43167|ZBT24_HUMAN		0.360115	0.263989	0.0760402	0.0717131	0.0746055	2.68665	0.0508444
sp|Q8TBB1|LNX1_HUMAN	3.5	0.25	0.0961538	0.0412088	0.021978	0.0274725	0.686813	0.0507259
sp|Q9P2E8|MARH4_HUMAN		0.385366	0.14878	0.0341463	0.0253165	0.0634146	2.44378	0.0498738
sp|P53861|ELOA1_YEAST		0.514512	0.467018	0.118734	0.123077	0.0897098	4.61567	0.0498667
sp|Q96SW2|CRBN_HUMAN		0.126697	0.142534	0.0633484	0.0714286	0.106335	1.34723	0.0491307
sp|Q06436|MAG2_YEAST		0.341791	0.277612	0.0955224	0.126638	0.11791	4.03007	0.0490785
sp|P07834|CDC4_YEAST		0.197689	0.160462	0.0590501	0.038961	0.0513479	1.01509	0.0489244
sp|O43298|ZBT43_HUMAN		0.426124	0.27409	0.0535332	0.0653266	0.0663812	2.82866	0.0482498
sp|Q9BRZ2|TRI56_HUMAN	0.0011	0.178808	0.128477	0.0384106	0.0814815	0.0410596	0.734178	0.047616
sp|Q9C0H6|KLHL4_HUMAN		0.182451	0.129526	0.0501393	0.0687023	0.0501393	0.914797	0.0472427
tr|Q53SV6|Q53SV6_HUMAN		0.515337	0.343558	0.0674847	0.0357143	0.208589	10.7494	0.0465422
sp|Q9Y330|ZBT12_HUMAN		0.250545	0.135076	0.0522876	0.0608696	0.0718954	1.8013	0.0465227
sp|Q9H0X6|RN208_HUMAN	0.003	0.329502	0.183908	0.0306513	0.0232558	0.153257	5.04984	0.0462933
sp|Q8WV16|DCAF4_HUMAN		0.19798	0.111111	0.0444444	0.0408163	0.0505051	0.999898	0.0457556
sp|Q9Y4L5|RN115_HUMAN	8.6e-28	0.404605	0.171053	0.0197368	0.0162602	0.0526316	2.1295	0.0455111
sp|O95376|ARI2_HUMAN		0.139959	0.121704	0.0567951	0.0289855	0.0770791	1.07879	0.0453298
sp|A1YPR0|ZBT7C_HUMAN		0.277868	0.22294	0.0516963	0.0639535	0.0630048	1.7507	0.0451369
sp|Q9BZR9|TRIM8_HUMAN	6.6e-05	0.22323	0.127042	0.061706	0.0243902	0.030853	0.688733	0.0449556
sp|Q9BZY9|TRI31_HUMAN	0.00015	0.296471	0.181176	0.0917647	0.134921	0.101176	2.99958	0.0449493
sp|Q4G163|FBX43_HUMAN		0.350282	0.141243	0.0833333	0.0766129	0.0268362	0.940024	0.0434551
sp|Q9Y3C5|RNF11_HUMAN	1.3e-12	0.493506	0.279221	0.025974	0.0131579	0.175325	8.65239	0.0432
sp|A6QL63|BTBDB_HUMAN		0.169384	0.0688406	0.0416667	0.0427807	0.0217391	0.368226	0.0428942
sp|P06779|RAD7_YEAST		0.276106	0.120354	0.0672566	0.0897436	0.0424779	1.17284	0.0425671
sp|Q8N461|FXL16_HUMAN		0.19833	0.121086	0.0375783	0.0421053	0.0563674	1.11793	0.04256
sp|P34909|NOT4_YEAST		0.420784	0.301533	0.0647359	0.0688259	0.0851789	3.58419	0.0416
sp|Q86YJ5|MARH9_HUMAN		0.433526	0.208092	0.0346821	0.02	0.118497	5.13716	0.0416
sp|O75382|TRIM3_HUMAN	8.9e-06	0.133065	0.126344	0.0403226	0.0808081	0.0685484	0.912136	0.0407244
sp|O94941|RNF37_HUMAN	0.012	0.192237	0.16451	0.0443623	0.0288462	0.10536	2.02541	0.03952
sp|Q9UK22|FBX2_HUMAN		0.175676	0.168919	0.0304054	0	0.125	2.19595	0.0393351
sp|Q6Q0C0|TRAF7_HUMAN	0.0063	0.179104	0.061194	0.0567164	0.025	0.0238806	0.427712	0.0391064
sp|Q5XUX1|FBXW9_HUMAN		0.20082	0.0840164	0.022541	0.0204082	0.0389344	0.78188	0.0390415
sp|Q9P2G3|KLH14_HUMAN		0.11465	0.0987261	0.044586	0.0416667	0.0764331	0.876303	0.0387698
sp|Q9HCI7|MSL2_HUMAN		0.230503	0.149047	0.0762565	0.180451	0.0589255	1.35825	0.0384124
sp|Q9HCK0|ZBT26_HUMAN		0.208617	0.113379	0.0770975	0.0652174	0.0680272	1.41916	0.0383289
sp|Q96CA5|BIRC7_HUMAN	0.4	0.33557	0.177852	0.0234899	0.02	0.0838926	2.81519	0.038163
sp|Q96KE9|BTBD6_HUMAN		0.148454	0.0927835	0.0391753	0.0138889	0.0556701	0.826443	0.03796
sp|Q99728|BARD1_HUMAN		0.302445	0.195624	0.0823681	0.0765957	0.0694981	2.10194	0.0377067
sp|Q5U5R9|HECD2_HUMAN		0.143041	0.0863402	0.0760309	0.0630631	0.064433	0.921657	0.0376889
sp|Q14134|TRI29_HUMAN		0.338435	0.205782	0.079932	0.0703518	0.0595238	2.0145	0.0376444
sp|Q5XX13|FBW10_HUMAN		0.151141	0.0760456	0.088403	0.163522	0.0323194	0.488477	0.037536
sp|O95714|HERC2_HUMAN		0.132602	0.0550269	0.0498552	0.0655226	0.0153082	0.202991	0.0374856
sp|P35226|BMI1_HUMAN	3.8e-06	0.395706	0.217791	0.0705521	0.0620155	0.0736196	2.91317	0.0370347
sp|Q5T0T0|MARH8_HUMAN	3.2e-06	0.285223	0.116838	0.0721649	0.0722892	0.0824742	2.35236	0.0364089
sp|Q96LD4|TRI47_HUMAN	0.0023	0.293103	0.0893417	0.023511	0.0213904	0.0250784	0.735056	0.0359538
sp|Q8N3P4|VPS8_HUMAN		0.115546	0.0497199	0.0588235	0.0909091	0.0287115	0.33175	0.0359396
sp|O15151|MDM4_HUMAN		0.361224	0.144898	0.0653061	0.0451977	0.0387755	1.40067	0.0355736
sp|Q5W0B1|RN219_HUMAN	2.2e-06	0.439394	0.19146	0.0909091	0.0971787	0.0482094	2.11829	0.0353007
sp|P39014|MET30_YEAST		0.235937	0.11875	0.0671875	0.0397351	0.065625	1.54834	0.0338489
sp|Q9Y483|MTF2_HUMAN		0.36425	0.131535	0.0944351	0.106481	0.0337268	1.2285	0.0337778
sp|Q96PU4|UHRF2_HUMAN	0.00069	0.216958	0.134663	0.0735661	0.143678	0.042394	0.91977	0.0333956
sp|Q9UK97|FBX9_HUMAN		0.178971	0.105145	0.049217	0.0625	0.0447427	0.800765	0.0333274
sp|Q9Y2K1|ZBTB1_HUMAN		0.326788	0.117812	0.0673212	0.0815451	0.0322581	1.05416	0.0318933
sp|Q96IK5|GMCL1_HUMAN		0.205825	0.0932039	0.0621359	0.0754717	0.0446602	0.91922	0.0310074
sp|Q96PQ7|KLHL5_HUMAN		0.100662	0.0543046	0.0423841	0.0263158	0.0225166	0.226657	0.0307461
sp|Q8IX29|FBX16_HUMAN		0.424658	0.236301	0.0924658	0.129032	0.133562	5.6718	0.0306222
sp|Q8TEB1|DCA11_HUMAN		0.179487	0.0750916	0.0384615	0.0102041	0.029304	0.52597	0.0304877
sp|Q5M7Z0|RNFT1_HUMAN	2e-10	0.248276	0.110345	0.0436782	0.0277778	0.0390805	0.970273	0.0302222
sp|Q9NWN3|FBX34_HUMAN		0.400844	0.240506	0.0759494	0.0912281	0.0731364	2.93163	0.0298596
sp|Q96DX4|RSPRY_HUMAN		0.138889	0.104167	0.0434028	0.0375	0.0277778	0.385802	0.0297244
sp|O15524|SOCS1_HUMAN		0.251185	0.127962	0.00473934	0	0.0758294	1.90472	0.0293973
sp|Q06640|YD306_YEAST		0.194561	0.125523	0.0941423	0.172043	0.0753138	1.46531	0.0288
sp|O75159|SOCS5_HUMAN		0.391791	0.201493	0.0578358	0.0571429	0.0727612	2.85072	0.028336
sp|Q66K64|DCA15_HUMAN		0.21	0.08	0.0433333	0.0238095	0.025	0.525	0.0280889
sp|Q14258|TRI25_HUMAN	5.7e-05	0.168254	0.126984	0.0793651	0.132075	0.0809524	1.36206	0.0279556
sp|Q8N5D0|WDTC1_HUMAN		0.150665	0.0753323	0.0487445	0.0784314	0.028065	0.42284	0.0278667
sp|Q8WU17|RN139_HUMAN	2e-20	0.118976	0.0406627	0.0240964	0.0126582	0.0286145	0.340443	0.0264142
sp|Q9ULV8|CBLC_HUMAN	7.3e-06	0.168776	0.109705	0.0337553	0.0375	0.0506329	0.854564	0.0257493
sp|Q9BYZ6|RHBT2_HUMAN		0.167813	0.0618982	0.0412655	0.0409836	0.0206327	0.346244	0.0254356
sp|Q8WVZ9|KBTB7_HUMAN		0.153509	0.0511696	0.0380117	0.0190476	0.0219298	0.336642	0.0254222
sp|P15918|RAG1_HUMAN	9.1e-06	0.130393	0.0824545	0.0872483	0.110294	0.029722	0.387554	0.025397
sp|Q9H000|MKRN2_HUMAN		0.269231	0.117788	0.0625	0.0714286	0.0384615	1.0355	0.025344
sp|Q5VTR2|BRE1A_HUMAN	0.0035	0.318974	0.182564	0.105641	0.135048	0.0184615	0.588876	0.02496
sp|Q12899|TRI26_HUMAN	2.1e-06	0.178108	0.12616	0.0649351	0.0208333	0.0296846	0.528705	0.0247182
sp|Q9UK99|FBX3_HUMAN		0.140127	0.0700637	0.0424628	0	0.0382166	0.535519	0.024624
sp|O15541|R113A_HUMAN	3.9	0.51312	0.262391	0.0845481	0.0965909	0.0728863	3.73994	0.0235185
sp|Q8WXI3|ASB10_HUMAN		0.117773	0.0877944	0.0149893	0.0545455	0.0342612	0.403505	0.0234667
sp|Q8TDB6|DTX3L_HUMAN	2.1e-08	0.217568	0.136486	0.0972973	0.0931677	0.0405405	0.882031	0.0230222
sp|Q9Y2F9|BTBD3_HUMAN		0.1341	0.0689655	0.0689655	0.157143	0.0344828	0.462412	0.022512
sp|P21268|FAR1_YEAST		0.0963855	0.0807229	0.0759036	0.1	0.0481928	0.464509	0.0214044
sp|Q6ZN54|DEFI8_HUMAN		0.132812	0.121094	0.0449219	0.0294118	0.0371094	0.492859	0.0213644
sp|P31244|RAD16_YEAST	6.6e-05	0.198734	0.0936709	0.0848101	0.146497	0.0265823	0.528281	0.0208444
sp|Q9BYM8|HOIL1_HUMAN	0.0055	0.227451	0.0901961	0.0392157	0.0603448	0.0313725	0.713572	0.0206507
sp|Q6ZT12|UBR3_HUMAN		0.127648	0.0667373	0.0566737	0.06639	0.0174788	0.223114	0.0197452
sp|P24278|ZBT25_HUMAN		0.218391	0.117241	0.045977	0.0421053	0.0367816	0.803277	0.0197215
sp|O75426|FBX24_HUMAN		0.12931	0.037931	0.0431034	0.04	0.037931	0.490488	0.0188124
sp|Q5TA31|RN187_HUMAN	0.088	0.225532	0.153191	0.0510638	0.0188679	0.0680851	1.53554	0.0188113
sp|Q8NAP8|ZBT8B_HUMAN		0.339394	0.165657	0.0444444	0.0416667	0.0363636	1.23416	0.0188
sp|Q07963|UBR2_YEAST		0.0902778	0.0315171	0.0667735	0.0650888	0.0181624	0.163966	0.0187861
sp|O76064|RNF8_HUMAN	4.1e-12	0.265979	0.136082	0.0948454	0.124031	0.043299	1.15166	0.0186667
sp|Q96Q07|BTBD9_HUMAN		0.104575	0.0522876	0.0375817	0.015625	0.0343137	0.358836	0.01848
sp|Q8WWF5|ZNRF4_HUMAN	8.5e-15	0.214452	0.125874	0.025641	0.0217391	0.0536131	1.14974	0.0184273
sp|Q96EP0|RNF31_HUMAN		0.142724	0.0839552	0.0279851	0.0326797	0.0307836	0.439355	0.0181807
sp|Q14139|UBE4A_HUMAN		0.0712946	0.0497186	0.0478424	0.0526316	0.0187617	0.133761	0.0179911
sp|Q9BYV2|TRI54_HUMAN	0.02	0.148045	0.111732	0.0502793	0	0.0698324	1.03383	0.0177333
sp|Q86Y13|DZIP3_HUMAN	1.4e-15	0.19702	0.100166	0.0869205	0.109244	0.0256623	0.505597	0.0174222
sp|Q04922|MFB1_YEAST		0.380645	0.131183	0.088172	0.0903955	0.0387097	1.47347	0.017408
sp|O60260|PRKN2_HUMAN		0.135484	0.0817204	0.0387097	0.031746	0.0408602	0.55359	0.0155153
sp|Q9NSE2|CISH_HUMAN		0.22093	0.205426	0.0271318	0.0350877	0.0697674	1.54137	0.015488
sp|Q8IUD6|RN135_HUMAN	5.5e-05	0.229167	0.0625	0.0393519	0.010101	0.037037	0.848765	0.0153316
sp|Q9H0A6|RNF32_HUMAN	1.3e-08	0.196133	0.118785	0.0994475	0.197183	0.0690608	1.35451	0.0152519
sp|P38748|ETP1_YEAST	1.6e-05	0.217094	0.0991453	0.100855	0.165354	0.0358974	0.779312	0.0152444
sp|O14543|SOCS3_HUMAN		0.293333	0.226667	0.0444444	0.0151515	0.0888889	2.60741	0.0148148
sp|Q05086|UBE3A_HUMAN		0.153143	0.0434286	0.0742857	0.119403	0.0171429	0.262531	0.0123733
sp|P53127|SNT2_YEAST		0.126158	0.0940841	0.0962224	0.152542	0.0142552	0.179841	0.0114844
sp|Q969Q1|TRI63_HUMAN	0.0031	0.175637	0.0793201	0.0708215	0.0645161	0.0679887	1.19414	0.0113778
sp|Q15916|ZBTB6_HUMAN		0.183962	0.0778302	0.0731132	0.0769231	0.0424528	0.780972	0.0112853
sp|Q7Z569|BRAP_HUMAN	0.0018	0.152027	0.157095	0.0777027	0.111111	0.035473	0.539285	0.0112
sp|Q06554|IRC20_YEAST	1e-11	0.12018	0.0449871	0.0751928	0.117647	0.0141388	0.16992	0.0108468
sp|P38285|AMN1_YEAST		0.162113	0.0947177	0.0783242	0.0786517	0.0327869	0.531518	0.010656
sp|Q8IWV8|UBR2_HUMAN		0.0723647	0.0404558	0.0518519	0.102362	0.00854701	0.0618501	0.00978222
sp|Q07457|BRE1_YEAST		0.194286	0.0757143	0.117143	0.154412	0.0285714	0.555102	0.0096
sp|P40985|HUL4_YEAST		0.142377	0.0426009	0.0818386	0.102362	0.0168161	0.239423	0.0094
sp|Q8IWV7|UBR1_HUMAN		0.0663236	0.0503145	0.056032	0.12931	0.0228702	0.151684	0.008832
sp|Q96A44|SPSB4_HUMAN		0.161172	0.106227	0.03663	0.113636	0.0549451	0.885561	0.00853333
sp|Q96T88|UHRF1_HUMAN	2.4e-06	0.180328	0.163934	0.0643127	0.125874	0.0214376	0.386579	0.00816
sp|Q9UK96|FBX10_HUMAN		0.129707	0.126569	0.0449791	0.0241935	0.0167364	0.217083	0.00806874
sp|Q99619|SPSB2_HUMAN		0.106464	0.178707	0.026616	0	0.0722433	0.769131	0.00802222
sp|Q13356|PPIL2_HUMAN		0.163462	0.148077	0.0942308	0.141176	0.0288462	0.471524	0.00782222
sp|O14508|SOCS2_HUMAN		0.207071	0.121212	0.0757576	0.0243902	0.0808081	1.6733	0.0071917
sp|P49754|VPS41_HUMAN		0.0550351	0.0409836	0.0807963	0.106383	0.028103	0.154665	0.00696889
sp|Q13618|CUL3_HUMAN		0.104167	0.0807292	0.078125	0.1125	0.0260417	0.271267	0.00688
sp|P63208|SKP1_HUMAN		0.0981595	0.423313	0.104294	0.125	0.337423	3.31213	0.0066
sp|Q9NV06|DCA13_HUMAN		0.0966292	0.0651685	0.0853933	0.186047	0.0426966	0.412574	0.00220681
sp|Q9UM13|APC10_HUMAN		0.0702703	0.227027	0.0594595	0.0769231	0.0810811	0.569759	0.00155556
sp|Q9BS18|APC13_HUMAN		0.540541	0.540541	0.0405405	0.025	0.540541	29.2184	0
tr|Q7Z3N5|Q7Z3N5_HUMAN		0.683333	0.433333	0.05	0.0365854	0.316667	21.6389	0
sp|Q9BW61|DDA1_HUMAN		0.470588	0.186275	0.0882353	0.125	0.166667	7.84314	0
sp|Q9P0P0|RN181_HUMAN	3.4e-25	0.339869	0.169935	0.0326797	0.0384615	0	0	0
sp|Q08109|HRD1_YEAST	1.2e-18	0.134301	0.0834846	0.0490018	0.0540541	0	0	0
sp|Q8WVZ7|RN133_HUMAN	1.8e-16	0.159574	0.0797872	0.0505319	0.0166667	0	0	0
sp|Q8WVD5|RN141_HUMAN	6.1e-16	0.252174	0.0217391	0.0521739	0.0172414	0	0	0
sp|Q9H9V4|RN122_HUMAN	1.6e-15	0.0387097	0	0.0709677	0	0	0	0
sp|Q96EQ8|RN125_HUMAN	2.4e-14	0.142241	0.00862069	0.0344828	0.030303	0	0	0
sp|Q06587|RING1_HUMAN	1.8e-13	0.5	0.544335	0.0418719	0.0147783	0	0	0
sp|P36096|TUL1_YEAST	1.4e-12	0.030343	0.00923483	0.0395778	0.0434783	0	0	0
sp|Q2KHN1|RN151_HUMAN	1.5e-12	0.183673	0.0489796	0.0571429	0.0222222	0	0	0
sp|Q9Y225|RNF24_HUMAN	7.5e-12	0.256757	0	0.0743243	0.0789474	0	0	0
sp|P38239|YBR2_YEAST	1.4e-11	0.338889	0.15	0.0388889	0	0	0	0
sp|Q99942|RNF5_HUMAN	2.9e-11	0.366667	0.111111	0.0222222	0.030303	0	0	0
sp|Q12157|APC11_YEAST	3.4e-11	0.127273	0.0727273	0.0363636	0.047619	0	0	0
sp|Q17RB8|LONF1_HUMAN	1.9e-10	0.152652	0.0168176	0.0478655	0.0423729	0	0	0
sp|O00237|RN103_HUMAN	5e-10	0.138686	0.00875912	0.0540146	0.0526316	0	0	0
sp|Q9HCM9|TRI39_HUMAN	8.5e-10	0.0907336	0.00965251	0.0714286	0.0638298	0	0	0
sp|Q9H4P4|RNF41_HUMAN	9.1e-10	0.0567823	0.022082	0.0347003	0.111111	0	0	0
sp|Q06834|ASR1_YEAST	1.2e-09	0.0625	0.0381944	0.0520833	0	0	0	0
sp|Q3KNV8|PCGF3_HUMAN	3.4e-09	0.210744	0.0578512	0.0950413	0.0980392	0	0	0
sp|Q14527|HLTF_HUMAN	6.4e-09	0.191278	0.0773043	0.0872151	0.108808	0	0	0
sp|Q9BSM1|PCGF1_HUMAN	7.2e-09	0.11583	0	0.0733591	0.166667	0	0	0
sp|Q96A37|RN166_HUMAN	1.1e-08	0.160338	0.0253165	0.0548523	0	0	0	0
sp|Q9H920|RN121_HUMAN	1.1e-08	0.0703364	0	0.0428135	0	0	0	0
sp|Q8N4F7|RN175_HUMAN	4.2e-08	0.0792683	0	0.0457317	0.0384615	0	0	0
sp|Q96EP1|CHFR_HUMAN	5.4e-08	0.39006	0.201807	0.0436747	0.046332	0	0	0
sp|Q8NEG5|ZSWM2_HUMAN	8.4e-08	0.131122	0.0236967	0.0916272	0.0963855	0	0	0
sp|Q08273|RBX1_YEAST	8.6e-08	0.289256	0.115702	0.0661157	0.0571429	0	0	0
sp|Q04781|LTN1_YEAST	8.8e-08	0.0236876	0.00320102	0.0755442	0.027027	0	0	0
sp|Q9NZS9|BFAR_HUMAN	1.2e-07	0.06	0	0.0488889	0.0740741	0	0	0
sp|P62877|RBX1_HUMAN	3.1e-07	0.166667	0.0833333	0.0555556	0	0	0	0
sp|Q9BWF2|TRAIP_HUMAN	3.3e-07	0.200426	0.140725	0.0938166	0.106383	0	0	0
sp|Q6PJ69|TRI65_HUMAN	5.4e-07	0.147002	0.032882	0.0193424	0.0131579	0	0	0
sp|Q9C040|TRIM2_HUMAN	7.4e-07	0.0927419	0.0712366	0.0645161	0.101449	0	0	0
sp|Q96K19|RN170_HUMAN	8.8e-07	0.0542636	0	0.00775194	0.0714286	0	0	0
sp|Q9UPQ4|TRI35_HUMAN	8.9e-07	0.0770791	0.0141988	0.0425963	0	0	0	0
sp|Q8IYM9|TRI22_HUMAN	9.7e-07	0.0401606	0	0.0742972	0.1	0	0	0
sp|Q9Y508|RN114_HUMAN	1.1e-06	0.109649	0	0.0526316	0	0	0	0
sp|P19474|RO52_HUMAN	1.5e-06	0.0357895	0.00421053	0.0568421	0	0	0	0
sp|Q9UDY6|TRI10_HUMAN	1.7e-06	0.031185	0.024948	0.037422	0	0	0	0
sp|Q9NYG5|APC11_HUMAN	2.7e-06	0.0595238	0	0.0833333	0.6	0	0	0
sp|O60858|TRI13_HUMAN	4e-06	0.044226	0	0.0859951	0.0555556	0	0	0
sp|Q9C035|TRIM5_HUMAN	4e-06	0.0709939	0	0.0628803	0.0285714	0	0	0
sp|Q495X7|TRI60_HUMAN	4.1e-06	0.0339703	0	0.0785563	0.1875	0	0	0
sp|Q8IWR1|TRI59_HUMAN	7e-06	0.0372208	0.0248139	0.0818859	0	0	0	0
sp|Q6P9F5|TRI40_HUMAN	1.2e-05	0.155039	0.0116279	0.0620155	0.075	0	0	0
sp|P32849|RAD5_YEAST	1.2e-05	0.180496	0.0863986	0.0821215	0.0663507	0	0	0
sp|Q86XT4|TRI50_HUMAN	2e-05	0.0862423	0.0123203	0.0513347	0.0952381	0	0	0
sp|Q9UBF6|RBX2_HUMAN	2.3e-05	0.318584	0.0530973	0.0619469	0.0555556	0	0	0
sp|Q9C030|TRIM6_HUMAN	2.4e-05	0.0286885	0	0.0532787	0.0714286	0	0	0
sp|Q5EBN2|TRI61_HUMAN	2.8e-05	0.129187	0.0334928	0.100478	0.222222	0	0	0
sp|Q8N9V2|TRIML_HUMAN	3.2e-05	0.200855	0.0790598	0.0512821	0.0319149	0	0	0
sp|Q6AZZ1|TRI68_HUMAN	3.4e-05	0.0453608	0.0123711	0.0515464	0	0	0	0
sp|Q9Y4K3|TRAF6_HUMAN	4.1e-05	0.0881226	0.00957854	0.0440613	0.0217391	0	0	0
sp|Q96D59|RN183_HUMAN	5.8e-05	0.15625	0	0.0208333	0	0	0	0
sp|Q96PM5|ZN363_HUMAN	6.7e-05	0.16092	0	0.0536398	0.047619	0	0	0
sp|Q8WVD3|RN138_HUMAN	7e-05	0.2	0.0326531	0.0367347	0	0	0	0
sp|Q8NG06|TRI58_HUMAN	0.00017	0.0781893	0.0349794	0.0349794	0.0263158	0	0	0
sp|Q9NXI6|RN186_HUMAN	0.00039	0.215859	0	0.0220264	0.0408163	0	0	0
sp|O94822|LTN1_HUMAN	0.00067	0.0662514	0.015855	0.0758777	0.111111	0	0	0
sp|P53769|CWC24_YEAST	0.0007	0.455598	0.169884	0.158301	0.186441	0	0	0
sp|Q9UJV3|TRIM1_HUMAN	0.00078	0.14966	0.014966	0.0598639	0.0818182	0	0	0
sp|Q96F44|TRI11_HUMAN	0.00089	0.147436	0.025641	0.0235043	0.0289855	0	0	0
sp|Q9Y577|TRI17_HUMAN	0.0014	0.127883	0.0398323	0.0503145	0.0983607	0	0	0
sp|Q9BYJ4|TRI34_HUMAN	0.0018	0.0922131	0	0.0778689	0.0888889	0	0	0
sp|Q9C029|TRIM7_HUMAN	0.002	0.127202	0.0684932	0.0508806	0.0153846	0	0	0
sp|O00635|TRI38_HUMAN	0.0024	0.0795699	0.0322581	0.0709677	0.0810811	0	0	0
sp|Q8NHY2|RFWD2_HUMAN	0.0046	0.218878	0.0396717	0.0642955	0.025	0	0	0
sp|O15344|TRI18_HUMAN	0.0052	0.167916	0.0164918	0.0584708	0.0982143	0	0	0
sp|Q9BY78|RNF26_HUMAN	0.0054	0.163972	0.0115473	0.0138568	0.0140845	0	0	0
sp|Q149N8|SHPRH_HUMAN	0.0063	0.175282	0.0487225	0.0754605	0.0983051	0	0	0
sp|P27801|PEP3_YEAST	0.0098	0.0108932	0	0.0969499	0.2	0	0	0
sp|P12868|PEP5_YEAST	0.013	0.0398445	0.0272109	0.0738581	0.0731707	0	0	0
sp|Q8N6D2|RN182_HUMAN	0.015	0.137652	0	0.048583	0	0	0	0
sp|Q9C019|TRI15_HUMAN	0.015	0.0516129	0.0172043	0.0494624	0.125	0	0	0
sp|Q9C037|TRIM4_HUMAN	0.018	0.034	0.006	0.066	0.117647	0	0	0
sp|Q9BVG3|TRI62_HUMAN	0.03	0.0294737	0.0168421	0.0484211	0.142857	0	0	0
sp|P14373|TRI27_HUMAN	0.041	0.0779727	0.0155945	0.0409357	0.025	0	0	0
sp|Q9UHC7|MKRN1_HUMAN	0.042	0.251037	0.118257	0.0560166	0.0413223	0	0	0
sp|A6NGJ6|TRI64_HUMAN	0.045	0.0623608	0.00890869	0.0356347	0.0357143	0	0	0
sp|Q86WT6|TRI69_HUMAN	0.049	0.042	0.006	0.082	0	0	0	0
sp|Q13114|TRAF3_HUMAN	0.06	0.110915	0.0158451	0.0897887	0.0793651	0	0	0
sp|O00463|TRAF5_HUMAN	0.091	0.0628366	0	0.0843806	0.0857143	0	0	0
sp|Q8TCQ1|MARH1_HUMAN	0.12	0.290657	0.0622837	0.0588235	0.0238095	0	0	0
sp|Q9BSJ1|TRI51_HUMAN	0.15	0.0309735	0	0.0486726	0	0	0	0
sp|Q13049|TRI32_HUMAN	0.58	0.0872894	0.0336907	0.0474732	0.0175439	0	0	0
sp|Q99675|CGRF1_HUMAN	0.72	0.144578	0.0271084	0.0572289	0.125	0	0	0
sp|Q9P0N8|MARH2_HUMAN	0.76	0.130081	0	0.0447154	0.0625	0	0	0
sp|Q96BQ3|TRI43_HUMAN	0.81	0.044843	0.0201794	0.0627803	0.05	0	0	0
sp|Q8N8N0|RN152_HUMAN	0.85	0.152709	0.0541872	0.044335	0	0	0	0
sp|Q86SE9|PCGF5_HUMAN	1.4	0.230469	0.0820312	0.0820312	0.135593	0	0	0
sp|P28328|PEX2_HUMAN	2.7	0.0590164	0	0.0721311	0.111111	0	0	0
sp|Q6ZMU5|TRI72_HUMAN	3	0.0230608	0.0209644	0.0377358	0	0	0	0
sp|Q6VVB1|NHLC1_HUMAN	3.5	0.0481013	0	0.035443	0	0	0	0
sp|Q15369|ELOC_HUMAN		0.142857	0.0357143	0.0535714	0.0625	0	0	0
sp|Q15370|ELOB_HUMAN		0	0.254237	0.059322	#DIV/0!	0.186441	0	0
sp|Q16531|DDB1_HUMAN		0	0.000877193	0.0473684	#DIV/0!	0	0	0
sp|Q9UJX6|ANC2_HUMAN		0.180049	0.0389294	0.0352798	0.0405405	0	0	0
sp|Q9UJX5|APC4_HUMAN		0.0730198	0.019802	0.0631188	0.0508475	0	0	0
sp|Q9UJX4|APC5_HUMAN		0.0596026	0.0211921	0.0596026	0.0444444	0	0	0
sp|Q9UJX2|CDC23_HUMAN		0.107203	0.0167504	0.0686767	0.046875	0	0	0
sp|Q8NHZ8|CDC26_HUMAN		0.694118	0.364706	0.105882	0.101695	0	0	0
sp|O95198|KLHL2_HUMAN		0.074199	0.00168634	0.0455312	0.0909091	0	0	0
sp|Q9UH77|KLHL3_HUMAN		0.149915	0.0136286	0.0477002	0.0795455	0	0	0
sp|Q8WZ60|KLHL6_HUMAN		0.0515298	0.00322061	0.057971	0.03125	0	0	0
sp|Q8IXQ5|KLHL7_HUMAN		0.0614334	0.00511945	0.0699659	0.194444	0	0	0
sp|Q9P2G9|KLHL8_HUMAN		0.0709677	0.016129	0.0467742	0.0909091	0	0	0
sp|Q9P2N7|KLH13_HUMAN		0.0503817	0.00916031	0.0549618	0.0606061	0	0	0
sp|Q6JEL2|KLH10_HUMAN		0.0460526	0.00657895	0.0476974	0	0	0	0
sp|Q9NVR0|KLH11_HUMAN		0.0748588	0.0183616	0.0409605	0	0	0	0
sp|Q53G59|KLH12_HUMAN		0.0352113	0.0140845	0.0387324	0.05	0	0	0
sp|Q96M94|KLH15_HUMAN		0.0182119	0.0182119	0.0480132	0	0	0	0
sp|Q9H2C0|GAN_HUMAN		0.0871022	0.0134003	0.0485762	0.0769231	0	0	0
sp|O94889|KLH18_HUMAN		0.0121951	0.0139373	0.0226481	0	0	0	0
sp|Q14145|KEAP1_HUMAN		0.0272436	0.0192308	0.025641	0	0	0	0
sp|Q9Y2M5|KLH20_HUMAN		0.110016	0.0689655	0.0328407	0.0298507	0	0	0
sp|Q9UJP4|KLH21_HUMAN		0.0703518	0.0268007	0.0134003	0	0	0	0
sp|Q53GT1|KLH22_HUMAN		0.0930599	0.0425868	0.022082	0	0	0	0
sp|Q8NBE8|KLH23_HUMAN		0.00716846	0	0.0537634	0.25	0	0	0
sp|Q6PF15|KLH35_HUMAN		0.0343053	0.00686106	0.0205832	0	0	0	0
sp|Q6TFL4|KLH24_HUMAN		0.0133333	0.00666667	0.0433333	0	0	0	0
sp|Q9H0H3|KLH25_HUMAN		0.0339559	0	0.049236	0.05	0	0	0
sp|O14682|ENC1_HUMAN		0.0373514	0	0.0594228	0.0454545	0	0	0
sp|Q53HC5|KLH26_HUMAN		0.108943	0.00813008	0.0178862	0.0149254	0	0	0
sp|Q9Y573|IPP_HUMAN		0.0410959	0	0.0479452	0.0833333	0	0	0
sp|Q9NXS3|KLH28_HUMAN		0.00875657	0	0.0402802	0	0	0	0
sp|Q0D2K2|KLH30_HUMAN		0.0553633	0.0155709	0.0311419	0.03125	0	0	0
sp|Q9H511|KLH31_HUMAN		0.0362776	0.0189274	0.0504732	0.130435	0	0	0
sp|Q96NJ5|KLH32_HUMAN		0.0129032	0	0.0306452	0	0	0	0
sp|A6NCF5|KLH33_HUMAN		0.0562852	0.00562852	0.0131332	0.0333333	0	0	0
sp|Q8N239|KLH34_HUMAN		0.121118	0.0388199	0.0108696	0	0	0	0
sp|Q8N4N3|KLH36_HUMAN		0.0616883	0.038961	0.0422078	0.184211	0	0	0
sp|Q2WGJ6|KLH38_HUMAN		0.020654	0	0.0499139	0	0	0	0
sp|Q8IY47|KBTB2_HUMAN		0.0256822	0.00802568	0.0497592	0.0625	0	0	0
sp|Q8NAB2|KBTB3_HUMAN		0.0131579	0	0.0625	0	0	0	0
sp|Q9NVX7|KBTB4_HUMAN		0.0250965	0	0.042471	0	0	0	0
sp|O60662|KLH41_HUMAN		0.0478548	0.0165017	0.0858086	0.137931	0	0	0
sp|Q2TBA0|KLH40_HUMAN		0.0724638	0.0289855	0.0483092	0.2	0	0	0
sp|Q8NFY9|KBTB8_HUMAN		0.0715474	0.0249584	0.063228	0.0930233	0	0	0
sp|Q9H0C5|BTBD1_HUMAN		0.093361	0.0829876	0.0414938	0	0	0	0
sp|Q5XKL5|BTBD8_HUMAN		0.0502646	0	0.0555556	0	0	0	0
sp|Q32M84|BTBDG_HUMAN		0.055336	0	0.0849802	0.178571	0	0	0
sp|Q969K4|ABTB1_HUMAN		0.041841	0	0.0376569	0	0	0	0
sp|Q8N961|ABTB2_HUMAN		0.12	0.0497561	0.0273171	0.0243902	0	0	0
sp|O94844|RHBT1_HUMAN		0.107759	0.045977	0.0617816	0.04	0	0	0
sp|O94955|RHBT3_HUMAN		0.0605565	0.0229133	0.0654664	0.108108	0	0	0
sp|Q8WZ19|BACD1_HUMAN		0.243161	0.0486322	0.0516717	0.025	0	0	0
sp|Q13829|BACD2_HUMAN		0.183544	0.0348101	0.0727848	0.0172414	0	0	0
sp|Q9H3F6|BACD3_HUMAN		0.220447	0.00638978	0.0702875	0.0434783	0	0	0
sp|Q9NR28|DBLOH_HUMAN		0.0209205	0.0251046	0.0543933	0.2	0	0	0
sp|O43791|SPOP_HUMAN		0.0882353	0.00534759	0.0775401	0.0606061	0	0	0
sp|Q13616|CUL1_HUMAN		0.056701	0.0244845	0.0876289	0.0909091	0	0	0
sp|Q13617|CUL2_HUMAN		0.052349	0.0281879	0.0805369	0.0512821	0	0	0
sp|Q13619|CUL4A_HUMAN		0.0527009	0.0342556	0.0909091	0.075	0	0	0
sp|Q93034|CUL5_HUMAN		0.024359	0.00512821	0.0961538	0.210526	0	0	0
sp|Q92466|DDB2_HUMAN		0.058548	0.0398126	0.0608899	0.16	0	0	0
sp|Q13216|ERCC8_HUMAN		0.0782828	0.0378788	0.0454545	0.0322581	0	0	0
sp|Q7L5Y6|DET1_HUMAN		0.0236364	0.00545455	0.0290909	0.153846	0	0	0
sp|Q8TEL6|TP4AP_HUMAN		0.0664994	0.0125471	0.0564617	0	0	0	0
sp|Q5T6F0|DCA12_HUMAN		0.121413	0.0507726	0.0618102	0.109091	0	0	0
sp|P61962|DCAF7_HUMAN		0.0175439	0	0.0321637	0.166667	0	0	0
sp|Q9UKB1|FBW1B_HUMAN		0.0553506	0	0.0442804	0.0333333	0	0	0
sp|Q9Y297|FBW1A_HUMAN		0.0975207	0	0.0528926	0.0847458	0	0	0
sp|Q9UKT8|FBXW2_HUMAN		0.0264317	0	0.0660793	0.166667	0	0	0
sp|P57775|FBXW4_HUMAN		0.0728155	0.0121359	0.0242718	0	0	0	0
sp|Q969U6|FBXW5_HUMAN		0.0618375	0.0371025	0.024735	0.0285714	0	0	0
sp|Q6X9E4|FBW12_HUMAN		0.00646552	0	0.0517241	0	0	0	0
sp|Q13309|SKP2_HUMAN		0.146226	0.0613208	0.0542453	0.112903	0	0	0
sp|Q9UKC9|FBXL2_HUMAN		0.0165485	0	0.0425532	0	0	0	0
sp|Q96IG2|FXL20_HUMAN		0.0275229	0.00688073	0.043578	0	0	0	0
sp|Q9UKT7|FBXL3_HUMAN		0.0794393	0.0280374	0.0584112	0.117647	0	0	0
sp|Q9UKA2|FBXL4_HUMAN		0.0273752	0.0177134	0.0466989	0	0	0	0
sp|Q9UKA1|FBXL5_HUMAN		0.089725	0.0173661	0.0607815	0.0483871	0	0	0
sp|Q96CD0|FBXL8_HUMAN		0.0454545	0	0.0106952	0	0	0	0
sp|Q8WV35|LRC29_HUMAN		0.183857	0.0986547	0.0224215	0.0487805	0	0	0
sp|Q9NXK8|FXL12_HUMAN		0.0184049	0	0.0306748	0	0	0	0
sp|Q8NEE6|FXL13_HUMAN		0.0952381	0.00680272	0.0693878	0.1	0	0	0
sp|Q8N1E6|FXL14_HUMAN		0.0287081	0	0.0334928	0	0	0	0
sp|Q9H469|FXL15_HUMAN		0.05	0	0.00666667	0	0	0	0
sp|Q96ME1|FXL18_HUMAN		0.0757764	0.00496894	0.0298137	0	0	0	0
sp|Q9UKT6|FXL21_HUMAN		0.0368664	0	0.0506912	0.125	0	0	0
sp|Q9UKT5|FBX4_HUMAN		0.183463	0.0723514	0.0335917	0.0422535	0	0	0
sp|Q9UKT4|FBX5_HUMAN		0.217002	0.0246085	0.0961969	0.113402	0	0	0
sp|Q9NRD1|FBX6_HUMAN		0.143345	0.0273038	0.0477816	0.0714286	0	0	0
sp|Q9NRD0|FBX8_HUMAN		0.0438871	0.00626959	0.0501567	0	0	0	0
sp|Q8NCQ5|FBX15_HUMAN		0.045098	0.00588235	0.0607843	0	0	0	0
sp|Q96EF6|FBX17_HUMAN		0.0611511	0	0.0215827	0	0	0	0
sp|O94952|FBX21_HUMAN		0.022293	0.00636943	0.0541401	0.0714286	0	0	0
sp|Q8NEZ5|FBX22_HUMAN		0.0297767	0.0148883	0.0421836	0.166667	0	0	0
sp|Q96FV3|TSN17_HUMAN		0.0407407	0	0.0407407	0.0909091	0	0	0
sp|Q969P5|FBX32_HUMAN		0.0140845	0.0056338	0.0873239	0	0	0	0
sp|Q8TCJ0|FBX25_HUMAN		0.0517711	0.0108992	0.0762943	0.210526	0	0	0
sp|Q8NI29|FBX27_HUMAN		0.0989399	0.0212014	0.0176678	0	0	0	0
sp|Q7Z6M2|FBX33_HUMAN		0.0864865	0.0108108	0.0288288	0	0	0	0
sp|Q8NEA4|FBX36_HUMAN		0.18617	0	0.0691489	0.171429	0	0	0
sp|Q8N4B4|FBX39_HUMAN		0.020362	0	0.061086	0	0	0	0
sp|Q9H4M3|FBX44_HUMAN		0.0431373	0.0117647	0.0509804	0	0	0	0
sp|P0C2W1|FBSP1_HUMAN		0.125874	0	0.0384615	0	0	0	0
sp|Q5MNV8|FBX47_HUMAN		0.0199115	0	0.0575221	0	0	0	0
sp|Q8WXH5|SOCS4_HUMAN		0.218182	0.0545455	0.0659091	0.0833333	0	0	0
sp|Q9Y576|ASB1_HUMAN		0.128358	0	0.0328358	0.0232558	0	0	0
sp|Q96Q27|ASB2_HUMAN		0.0647359	0.0528109	0.0528109	0	0	0	0
sp|Q9Y575|ASB3_HUMAN		0.015444	0	0.0482625	0	0	0	0
sp|Q9Y574|ASB4_HUMAN		0.0352113	0	0.0586854	0.0666667	0	0	0
sp|Q8WWX0|ASB5_HUMAN		0.0486322	0	0.0364742	0	0	0	0
sp|Q9NWX5|ASB6_HUMAN		0.0902613	0.0118765	0.0380048	0	0	0	0
sp|Q9H672|ASB7_HUMAN		0.0377358	0.00628931	0.0440252	0	0	0	0
sp|Q9H765|ASB8_HUMAN		0.0173611	0.0138889	0.0416667	0	0	0	0
sp|Q96DX5|ASB9_HUMAN		0.0612245	0.0306122	0.047619	0.111111	0	0	0
sp|Q8WXH4|ASB11_HUMAN		0.0185759	0	0.0495356	0.166667	0	0	0
sp|Q8WXK4|ASB12_HUMAN		0.0841424	0.0485437	0.0291262	0.0769231	0	0	0
sp|Q8WXK3|ASB13_HUMAN		0.0251799	0.0143885	0.0467626	0.142857	0	0	0
sp|A6NK59|ASB14_HUMAN		0.0408859	0.0136286	0.0562181	0	0	0	0
sp|Q8WXK1|ASB15_HUMAN		0.0272109	0.0119048	0.0578231	0.0625	0	0	0
sp|Q96NS5|ASB16_HUMAN		0.112583	0.0419426	0.0154525	0.0196078	0	0	0
sp|Q8WXJ9|ASB17_HUMAN		0.0271186	0	0.0576271	0.25	0	0	0
sp|Q6ZVZ8|ASB18_HUMAN		0.107296	0.0386266	0.0321888	0	0	0	0
sp|Q9Y6I7|WSB1_HUMAN		0.0736342	0.0118765	0.0427553	0.0645161	0	0	0
sp|Q9NYS7|WSB2_HUMAN		0.0792079	0.0470297	0.0544554	0.15625	0	0	0
sp|Q96BD6|SPSB1_HUMAN		0.0659341	0	0.047619	0.111111	0	0	0
sp|Q6PJ21|SPSB3_HUMAN		0.259155	0.0901408	0.0450704	0.0217391	0	0	0
sp|Q12829|RB40B_HUMAN		0.154676	0.0431655	0.0539568	0.116279	0	0	0
sp|Q96S21|RB40C_HUMAN		0.16726	0.0427046	0.0569395	0.0851064	0	0	0
sp|Q96L50|LLR1_HUMAN		0.0169082	0	0.0748792	0.285714	0	0	0
sp|Q9UK73|FEM1B_HUMAN		0.0239234	0.0318979	0.046252	0.2	0	0	0
sp|Q7Z7L7|ZER1_HUMAN		0.0313316	0	0.0469974	0.0416667	0	0	0
sp|Q6WRX3|ZY11A_HUMAN		0.0210804	0.00131752	0.0527009	0	0	0	0
sp|Q9C0D3|ZY11B_HUMAN		0.0389785	0.0120968	0.0497312	0.0689655	0	0	0
sp|Q15034|HERC3_HUMAN		0.0171429	0.00761905	0.0542857	0.0555556	0	0	0
sp|Q15386|UBE3C_HUMAN		0.0747922	0.0147738	0.0461681	0.0740741	0	0	0
sp|Q5GLZ8|HERC4_HUMAN		0.0208136	0.00567644	0.0624409	0.0454545	0	0	0
sp|Q5T447|HECD3_HUMAN		0.0696864	0.00696864	0.047619	0.0166667	0	0	0
sp|Q7Z3V4|UBE3B_HUMAN		0.0299625	0	0.0580524	0	0	0	0
sp|Q8IYU2|HACE1_HUMAN		0.0682068	0.0319032	0.039604	0.0483871	0	0	0
sp|Q9HAU4|SMUF2_HUMAN		0.124332	0.122995	0.0534759	0	0	0	0
sp|O43255|SIAH2_HUMAN		0.225309	0.0709877	0.0339506	0.0273973	0	0	0
sp|O75678|RFPL2_HUMAN		0.124339	0.0396825	0.0396825	0.0638298	0	0	0
sp|O76050|NEU1A_HUMAN		0.209059	0.0418118	0.0348432	0.025	0	0	0
sp|P51948|MAT1_HUMAN		0.0938511	0.02589	0.0873786	0.0689655	0	0	0
sp|Q12933|TRAF2_HUMAN		0.0359281	0.0159681	0.0618762	0	0	0	0
sp|Q13489|BIRC3_HUMAN		0.119205	0.0215232	0.0480132	0.0138889	0	0	0
sp|Q13490|BIRC2_HUMAN		0.0954693	0.0469256	0.0614887	0.0508475	0	0	0
sp|Q495C1|RN212_HUMAN		0.20202	0.020202	0.0606061	0.0833333	0	0	0
tr|Q53EV8|Q53EV8_HUMAN		0.194226	0.023622	0.0839895	0.175676	0	0	0
tr|Q53FX3|Q53FX3_HUMAN		0.0584485	0.0148778	0.0626993	0.0363636	0	0	0
tr|Q6GX22|Q6GX22_HUMAN		0.121168	0.0160584	0.0583942	0.0843373	0	0	0
tr|Q6PIA0|Q6PIA0_HUMAN		0.0974576	0.0211864	0.0805085	0.0434783	0	0	0
sp|Q6UWE0|LRSM1_HUMAN		0.206086	0.0484094	0.055325	0.0604027	0	0	0
sp|Q7Z419|R144B_HUMAN		0.0594059	0	0.0528053	0.222222	0	0	0
sp|Q86YT6|MIB1_HUMAN		0.0815109	0.0586481	0.0606362	0.0609756	0	0	0
sp|Q8IUQ4|SIAH1_HUMAN		0.106383	0	0.035461	0.0333333	0	0	0
sp|P0CI25|TRI49_HUMAN		0.0154867	0.00442478	0.0619469	0	0	0	0
sp|P36406|TRI23_HUMAN		0.0400697	0.00696864	0.054007	0.0869565	0	0	0
sp|P50876|R144A_HUMAN		0.0513699	0	0.0650685	0.0666667	0	0	0
sp|P98170|XIAP_HUMAN		0.118712	0.0342052	0.0583501	0.0508475	0	0	0
sp|Q14142|TRI14_HUMAN		0.0904977	0.0271493	0.0429864	0.05	0	0	0
sp|Q6ZTA4|TRI67_HUMAN		0.213282	0.0217114	0.0485313	0.0359281	0	0	0
tr|Q71SF7|Q71SF7_HUMAN		0.279346	0.115899	0.0936107	0.117021	0	0	0
sp|Q7Z4K8|TRI46_HUMAN		0.142292	0.0632411	0.0395257	0.0277778	0	0	0
sp|Q9ULX5|RN112_HUMAN		0.161648	0.0364501	0.044374	0.0392157	0	0	0
sp|Q86UD3|MARH3_HUMAN		0.0948617	0	0.027668	0.0416667	0	0	0
sp|Q8IWZ4|TRI48_HUMAN		0.0432692	0	0.0576923	0	0	0	0
sp|Q8IWZ5|TRI42_HUMAN		0.0608575	0.0055325	0.06639	0.0909091	0	0	0
sp|Q8N2H9|PELI3_HUMAN		0.264392	0.162047	0.021322	0.0241935	0	0	0
sp|Q8N806|UBR7_HUMAN		0.164706	0.0541176	0.08	0.0714286	0	0	0
sp|Q8WV22|NSE1_HUMAN		0.112782	0	0.0789474	0.133333	0	0	0
sp|Q8WY64|MYLIP_HUMAN		0.0719101	0	0.0539326	0.03125	0	0	0
sp|Q969V5|MUL1_HUMAN		0.0539773	0	0.0653409	0.0526316	0	0	0
sp|Q96FA3|PELI1_HUMAN		0.138756	0.145933	0.0502392	0.0517241	0	0	0
sp|Q96G75|RMD5B_HUMAN		0.0305344	0	0.0483461	0	0	0	0
sp|Q9C026|TRIM9_HUMAN		0.140845	0.0169014	0.0521127	0.02	0	0	0
sp|Q9H8W5|TRI45_HUMAN		0.0775862	0.0327586	0.0706897	0.0222222	0	0	0
sp|Q9HAT8|PELI2_HUMAN		0.116667	0.133333	0.047619	0.0204082	0	0	0
sp|Q9NPC3|CIP1_HUMAN		0.140794	0.129964	0.0685921	0.0512821	0	0	0
sp|Q9NV58|RN19A_HUMAN		0.315036	0.147971	0.0560859	0.0795455	0	0	0
sp|Q9NW38|FANCL_HUMAN		0.032	0	0.0533333	0.0833333	0	0	0
sp|Q9NX47|MARH5_HUMAN		0.0431655	0	0.0467626	0	0	0	0
sp|Q9UBS8|RNF14_HUMAN		0.111814	0.0021097	0.0548523	0.0566038	0	0	0
sp|Q9Y675|SNURF_HUMAN		0.760563	0.253521	0.0140845	0.0185185	0	0	0
sp|Q9UMS4|PRP19_HUMAN		0.0992063	0.047619	0.0595238	0.12	0	0	0
sp|Q9UNE7|CHIP_HUMAN		0.181518	0.132013	0.0660066	0.0909091	0	0	0
sp|P36113|YKZ7_YEAST		0.0707804	0.0127042	0.0816697	0.0769231	0	0	0
sp|Q08496|DIA2_YEAST		0.0314208	0	0.0874317	0.130435	0	0	0
sp|Q12347|HRT3_YEAST		0.101744	0	0.0959302	0.114286	0	0	0
sp|Q04693|RSE1_YEAST		0.0749449	0.0191036	0.0609846	0.0490196	0	0	0
sp|P54860|UFD2_YEAST		0.00832466	0.0270552	0.0718002	0.25	0	0	0
sp|Q03900|YD132_YEAST		0.127273	0.00808081	0.0868687	0.047619	0	0	0
sp|P47005|DAS1_YEAST		0.105581	0.0165913	0.0723982	0.0285714	0	0	0
sp|Q04370|PEX12_YEAST		0.120301	0.0175439	0.0701754	0.0416667	0	0	0
sp|P54074|ASI1_YEAST		0.110577	0.0416667	0.0576923	0.0724638	0	0	0
sp|Q05947|YL224_YEAST		0.097561	0.00542005	0.0596206	0.0555556	0	0	0
sp|P32523|PRP19_YEAST		0.0636183	0.027833	0.0755467	0.15625	0	0	0
sp|Q05930|MDM30_YEAST		0.0367893	0	0.0501672	0.0454545	0	0	0
sp|Q12259|YL108_YEAST		0.0701031	0	0.0886598	0.117647	0	0	0
sp|P53119|HUL5_YEAST		0.0747253	0.00989011	0.0802198	0.117647	0	0	0
sp|P53971|FAP1_YEAST		0.103627	0.0300518	0.0901554	0.05	0	0	0
sp|Q06651|PIB1_YEAST		0.346154	0.15035	0.0559441	0.0505051	0	0	0
sp|P42843|SKP2_YEAST		0.0891219	0.0301442	0.0668414	0.0735294	0	0	0
sp|Q12508|RMD5_YEAST		0.0356295	0.0261283	0.118765	0.0666667	0	0	0
sp|P39531|RCY1_YEAST		0.0761905	0.0261905	0.0869048	0.046875	0	0	0
sp|P40560|YIA1_YEAST		0.0233918	0	0.0604288	0.0833333	0	0	0
sp|P53983|ASI3_YEAST		0.066568	0.010355	0.0650888	0.111111	0	0	0
sp|Q04673|SSL1_YEAST		0.18872	0.0585683	0.0737527	0.091954	0	0	0
sp|Q04638|ITT1_YEAST		0.0237069	0	0.0818966	0	0	0	0
sp|Q03290|TFB3_YEAST		0.0311526	0.00934579	0.105919	0	0	0	0
sp|P32800|PEX2_YEAST		0.0811808	0	0.0442804	0	0	0	0
sp|Q04847|ROY1_YEAST		0.0216998	0	0.074141	0.0833333	0	0	0
sp|P39702|VPS8_YEAST		0.0565149	0.00784929	0.0620094	0.0694444	0	0	0
